# Supplementary material for: High solar-to-hydrogen efficiency in the novel derivatives of group-III trichalcogenides for photocatalytic water splitting: the effect of elemental composition
Source: Royal Society of Chemistry journal article supplement (doi:10.1039/d3ta01443f), 2023-01-01
Supplement: d3ta01443f1.pdf [file d3ta01443f1.pdf]

**Supporting information for**

**High solar-to-hydrogen efficiency in the novel derivatives of**

**group-III trichalcogenides for photocatalytic water splitting: the**

**effect of elemental composition**

Hao Ma<sup>a</sup>, Wen Zhao<sup>a, \*</sup>, Saifei Yuan<sup>a</sup>, Hao Ren<sup>a</sup>, Houyu Zhu<sup>a</sup>, Yuhua Chi<sup>a</sup>, Wenyue Guo<sup>a, \*</sup>

*<sup>a</sup> School of Materials Science and Engineering, China University of Petroleum (East China), Qingdao 266580, Shandong, China*

\* Corresponding author.

E-mail addresses: [zhaowen@upc.edu.cn](mailto:zhaowen@upc.edu.cn) (Wen Zhao) and [wycguo@upc.edu.cn](mailto:wycguo@upc.edu.cn) (Wenyue Guo)

**Table S1** Calculated lattice parameters ( $a=b$ ), total heights ( $h$ ), interlayer distances between the two Group-III metal layers ( $l$ ), formation energies ( $E_{form}$ ), band types, band gaps at the HSE level ( $E_g^{HSE}$ ) and the PBE level ( $E_g^{PBE}$ ), differences of electrostatic potential between the two surfaces ( $\Delta\phi$ ), overpotentials for the hydrogen evolution reaction  $\chi(\text{H}_2)$  and for the oxygen evolution reaction  $\chi(\text{O}_2)$  of the  $\text{MNX}_3$  (M, N = In/Ga/Al; X = S/Se/Te) monolayers, including  $\alpha$  and  $\beta$  phases.

| Materials<br>$\text{MNX}_3$    | $a = b$<br>(Å) | $h$<br>(Å) | $l$<br>(Å) | $E_{form}$<br>(eV/atom) | Band<br>type | $E_g^{HSE}$<br>(eV) | $E_g^{PBE}$<br>(eV) | $\Delta\phi$<br>(eV) | $\chi(\text{H}_2)$<br>(eV) | $\chi(\text{O}_2)$<br>(eV) |
|--------------------------------|----------------|------------|------------|-------------------------|--------------|---------------------|---------------------|----------------------|----------------------------|----------------------------|
| InGaS <sub>3</sub> - $\alpha$  | 3.81           | 6.09       | 3.86       | -0.75                   | I            | 1.71                | 0.95                | 1.77                 | 0.23                       | 2.01                       |
| InGaS <sub>3</sub> - $\beta$   | 3.77           | 6.25       | 3.91       | -0.66                   | I            | 2.47                | 1.62                | 1.43                 | 0.62                       | 2.05                       |
| InGaSe <sub>3</sub> - $\alpha$ | 3.99           | 6.50       | 4.06       | -0.74                   | I            | 1.07                | 0.43                | 1.42                 | 0.02                       | 1.23                       |
| InGaSe <sub>3</sub> - $\beta$  | 3.95           | 6.64       | 4.10       | -0.66                   | I            | 1.78                | 1.07                | 1.21                 | 0.52                       | 1.23                       |
| InGaTe <sub>3</sub> - $\alpha$ | 4.28           | 7.10       | 4.39       | -0.47                   | I            | 0.68                | 0.17                | 1.02                 | 0.28                       | 0.19                       |
| InGaTe <sub>3</sub> - $\beta$  | 4.26           | 7.23       | 4.44       | -0.41                   | I            | 1.19                | 0.31                | 0.82                 | 0.64                       | 0.14                       |
| InAlS <sub>3</sub> - $\alpha$  | 3.79           | 6.06       | 3.86       | -0.90                   | D            | 2.35                | 1.06                | 2.07                 | 1.25                       | 1.94                       |
| InAlS <sub>3</sub> - $\beta$   | 3.72           | 6.25       | 3.89       | -0.86                   | I            | 2.72                | 1.42                | 1.87                 | 0.85                       | 2.51                       |
| InAlSe <sub>3</sub> - $\alpha$ | 3.97           | 6.47       | 4.06       | -0.83                   | D            | 1.67                | 0.58                | 1.58                 | 0.81                       | 1.21                       |
| InAlSe <sub>3</sub> - $\beta$  | 3.91           | 6.62       | 4.07       | -0.81                   | I            | 2.12                | 1.13                | 1.62                 | 0.86                       | 1.65                       |
| InAlTe <sub>3</sub> - $\alpha$ | 4.27           | 7.10       | 4.40       | -0.49                   | I            | 1.18                | 0.41                | 1.13                 | 0.88                       | 0.21                       |
| InAlTe <sub>3</sub> - $\beta$  | 4.24           | 7.19       | 4.38       | -0.49                   | I            | 1.56                | 0.84                | 1.21                 | 0.96                       | 0.57                       |
| GaAlS <sub>3</sub> - $\alpha$  | 3.63           | 5.88       | 3.73       | -0.93                   | I            | 2.62                | 1.62                | 1.87                 | 1.33                       | 1.92                       |
| GaAlS <sub>3</sub> - $\beta$   | 3.61           | 5.89       | 3.71       | -0.99                   | I            | 2.80                | 1.49                | 2.20                 | 1.39                       | 2.37                       |
| GaAlSe <sub>3</sub> - $\alpha$ | 3.83           | 6.30       | 3.94       | -0.81                   | I            | 1.84                | 1.08                | 1.44                 | 1.00                       | 1.05                       |
| GaAlSe <sub>3</sub> - $\beta$  | 3.81           | 6.28       | 3.90       | -0.88                   | I            | 1.90                | 0.82                | 1.82                 | 0.99                       | 1.50                       |
| GaAlTe <sub>3</sub> - $\alpha$ | 4.15           | 6.92       | 4.30       | -0.44                   | I            | 0.71                | 0.24                | 0.97                 | 0.47                       | -0.02                      |
| GaAlTe <sub>3</sub> - $\beta$  | 4.13           | 6.87       | 4.23       | -0.51                   | I            | 1.24                | 0.48                | 1.30                 | 0.92                       | 0.39                       |

**Table S2** Calculated lattice parameters ( $a=b$ ), total heights ( $h$ ), interlayer distances between the two Group-III metal layers ( $l$ ), formation energies ( $E_{form}$ ), band types, band gaps at the HSE level ( $E_g^{HSE}$ ) and the PBE level ( $E_g^{PBE}$ ), differences of electrostatic potential between the two surfaces ( $\Delta\phi$ ), overpotentials for the hydrogen evolution reaction  $\chi(\text{H}_2)$  and the oxygen evolution reaction  $\chi(\text{O}_2)$  of the  $\text{InGaXY}_2$  ( $X, Y = \text{S/Se/Te}$ ) monolayer, including  $\alpha$  and  $\beta$  phases (here, the most stable configurations are highlighted with blue font, and a material with a bandgap below 0.4 eV is typically classified as a metal).

| Materials                                       | Type       | $a = b$<br>(Å) | $h$<br>(Å)  | $l$<br>(Å)  | $E_{form}$<br>(eV/atom) | Band<br>type | $E_g^{HSE}$<br>(eV) | $E_g^{PBE}$<br>(eV) | $\Delta\phi$<br>(eV) | $\chi(\text{H}_2)$<br>(eV) | $\chi(\text{O}_2)$<br>(eV) |
|-------------------------------------------------|------------|----------------|-------------|-------------|-------------------------|--------------|---------------------|---------------------|----------------------|----------------------------|----------------------------|
| <b>InGaSSe<sub>2</sub>-<math>\alpha</math></b>  | I          | 3.92           | 6.43        | 4.09        | -0.69                   | I            | 0.64                | 0.07                | 1.35                 | -0.29                      | 1.05                       |
|                                                 | II         | 3.93           | 6.41        | 4.09        | -0.71                   | I            | 1.47                | 0.72                | 1.74                 | 0.27                       | 1.71                       |
|                                                 | <b>III</b> | <b>3.95</b>    | <b>6.32</b> | <b>3.84</b> | <b>-0.74</b>            | <b>D</b>     | <b>1.09</b>         | <b>0.48</b>         | <b>1.59</b>          | <b>0.27</b>                | <b>1.18</b>                |
| <b>InGaSSe<sub>2</sub>-<math>\beta</math></b>   | <b>I</b>   | <b>3.89</b>    | <b>6.55</b> | <b>4.12</b> | <b>-0.64</b>            | <b>I</b>     | <b>1.61</b>         | <b>0.92</b>         | <b>1.02</b>          | <b>0.26</b>                | <b>1.14</b>                |
|                                                 | II         | 3.87           | 6.59        | 4.13        | -0.61                   | I            | 1.84                | 1.07                | 1.50                 | 0.50                       | 1.61                       |
|                                                 | III        | 3.91           | 6.48        | 3.90        | -0.63                   | I            | 2.13                | 1.41                | 1.30                 | 0.72                       | 1.48                       |
| <b>InGaSeS<sub>2</sub>-<math>\alpha</math></b>  | <b>I</b>   | <b>3.89</b>    | <b>6.21</b> | <b>3.86</b> | <b>-0.74</b>            | <b>I</b>     | <b>1.98</b>         | <b>1.22</b>         | <b>1.91</b>          | <b>0.54</b>                | <b>2.12</b>                |
|                                                 | II         | 3.97           | 6.37        | 3.81        | -0.52                   | M            | -                   | -                   | 0.61                 | -                          | -                          |
|                                                 | III        | 3.86           | 6.33        | 4.11        | -0.69                   | I            | 1.15                | 0.40                | 1.64                 | -0.05                      | 1.61                       |
| <b>InGaSeS<sub>2</sub>-<math>\beta</math></b>   | I          | 3.82           | 6.41        | 3.91        | -0.62                   | I            | 2.47                | 1.63                | 1.64                 | 0.79                       | 2.09                       |
|                                                 | <b>II</b>  | <b>3.84</b>    | <b>6.37</b> | <b>3.91</b> | <b>-0.64</b>            | <b>I</b>     | <b>1.93</b>         | <b>1.22</b>         | <b>1.15</b>          | <b>0.48</b>                | <b>1.36</b>                |
|                                                 | III        | 3.82           | 6.48        | 4.14        | -0.62                   | I            | 1.76                | 0.99                | 1.29                 | 0.30                       | 1.52                       |
| <b>InGaSTe<sub>2</sub>-<math>\alpha</math></b>  | I          | 4.11           | 6.91        | 4.47        | -0.43                   | M            | -                   | -                   | 0.40                 | -                          | -                          |
|                                                 | II         | 4.13           | 6.85        | 4.44        | -0.48                   | D            | 0.94                | 0.31                | 1.71                 | 0.72                       | 0.70                       |
|                                                 | <b>III</b> | <b>4.19</b>    | <b>6.53</b> | <b>3.78</b> | <b>-0.55</b>            | <b>D</b>     | <b>0.94</b>         | <b>0.42</b>         | <b>1.21</b>          | <b>0.78</b>                | <b>0.14</b>                |
| <b>InGaSTe<sub>2</sub>-<math>\beta</math></b>   | <b>I</b>   | <b>4.09</b>    | <b>6.97</b> | <b>4.48</b> | <b>-0.44</b>            | <b>M</b>     | <b>0.38</b>         | <b>0</b>            | <b>0.45</b>          | <b>-</b>                   | <b>-</b>                   |
|                                                 | II         | 4.09           | 7.04        | 4.47        | -0.36                   | I            | 0.53                | 0                   | 1.62                 | 0.11                       | 0.81                       |
|                                                 | III        | 4.16           | 6.69        | 3.86        | -0.42                   | I            | 1.38                | 0.84                | 0.92                 | 0.60                       | 0.47                       |
| <b>InGaTeS<sub>2</sub>-<math>\alpha</math></b>  | <b>I</b>   | <b>4.02</b>    | <b>6.29</b> | <b>3.82</b> | <b>-0.63</b>            | <b>I</b>     | <b>2.52</b>         | <b>1.82</b>         | <b>2.03</b>          | <b>1.27</b>                | <b>2.04</b>                |
|                                                 | II         | 3.97           | 6.36        | 3.81        | -0.58                   | M            | -                   | -                   | 0.60                 | -                          | -                          |
|                                                 | III        | 3.94           | 6.69        | 4.58        | -0.53                   | M            | -                   | -                   | 1.18                 | -                          | -                          |
| <b>InGaTeS<sub>2</sub>-<math>\beta</math></b>   | I          | 3.95           | 6.53        | 3.88        | -0.45                   | D            | 1.31                | 0.56                | 1.89                 | 0.80                       | 1.17                       |
|                                                 | <b>II</b>  | <b>3.97</b>    | <b>6.46</b> | <b>3.89</b> | <b>-0.52</b>            | <b>D</b>     | <b>0.67</b>         | <b>0.13</b>         | <b>0.68</b>          | <b>0.22</b>                | <b>-0.10</b>               |
|                                                 | III        | 3.88           | 6.87        | 4.59        | -0.48                   | M            | -                   | -                   | 0.93                 | -                          | -                          |
| <b>InGaSeTe<sub>2</sub>-<math>\alpha</math></b> | I          | 4.17           | 7.00        | 4.44        | -0.48                   | M            | -                   | -                   | 0.77                 | -                          | -                          |
|                                                 | II         | 4.21           | 6.94        |             | -0.52                   | I            | 0.99                | 0.40                | 1.45                 | 0.52                       | 0.69                       |
|                                                 | <b>III</b> | <b>4.23</b>    | <b>6.74</b> | <b>4.00</b> | <b>-0.55</b>            | <b>D</b>     | <b>0.86</b>         | <b>0.36</b>         | <b>1.16</b>          | <b>0.56</b>                | <b>0.23</b>                |
| <b>InGaSeTe<sub>2</sub>-<math>\beta</math></b>  | <b>I</b>   | <b>4.15</b>    | <b>7.09</b> | <b>4.46</b> | <b>-0.47</b>            | <b>I</b>     | <b>0.66</b>         | <b>0.18</b>         | <b>0.56</b>          | <b>0.03</b>                | <b>-0.04</b>               |
|                                                 | II         | 4.13           | 7.15        | 4.45        | -0.42                   | I            | 0.90                | 0.32                | 1.33                 | 0.36                       | 0.64                       |
|                                                 | III        | 4.21           | 6.89        | 4.07        | -0.46                   | I            | 1.33                | 0.78                | 0.88                 | 0.49                       | 0.49                       |
| <b>InGaTeSe<sub>2</sub>-<math>\alpha</math></b> | <b>I</b>   | <b>4.12</b>    | <b>6.60</b> | <b>4.03</b> | <b>-0.64</b>            | <b>I</b>     | <b>1.98</b>         | <b>1.28</b>         | <b>1.64</b>          | <b>1.00</b>                | <b>1.39</b>                |
|                                                 | II         | 4.10           | 6.65        | 4.02        | -0.60                   | M            | -                   | -                   | 1.01                 | -                          | -                          |
|                                                 | III        | 4.07           | 6.87        | 4.49        | -0.57                   | M            | -                   | -                   | 1.16                 | -                          | -                          |
| <b>InGaTeSe<sub>2</sub>-<math>\beta</math></b>  | I          | 4.08           | 6.80        | 4.08        | -0.51                   | D            | 1.51                | 0.81                | 1.44                 | 0.56                       | 1.16                       |
|                                                 | <b>II</b>  | <b>4.08</b>    | <b>6.76</b> | <b>4.09</b> | <b>-0.56</b>            | <b>I</b>     | <b>1.10</b>         | <b>0.57</b>         | <b>0.69</b>          | <b>0.34</b>                | <b>0.22</b>                |
|                                                 | III        | 4.03           | 7.0         | 4.48        | -0.53                   | D            | 0.76                | 0.19                | 1.01                 | 0.17                       | 0.37                       |

**Table S3** Calculated lattice parameters ( $a=b$ ), total heights ( $h$ ), interlayer distances between the two Group-III metal layers ( $l$ ), formation energies ( $E_{form}$ ), band types, band gaps at the HSE level ( $E_g^{HSE}$ ) and the PBE level ( $E_g^{PBE}$ ), differences of electrostatic potential between the two surfaces ( $\Delta\phi$ ), overpotentials for the hydrogen evolution reaction  $\chi(\text{H}_2)$  and the oxygen evolution reaction  $\chi(\text{O}_2)$  of the  $\text{InAlXY}_2$  ( $X, Y = \text{S/Se/Te}$ ) monolayers, including  $\alpha$  and  $\beta$  phases (here, the most stable configurations are highlighted with blue font, and a material with a bandgap below 0.4 eV is typically classified as a metal).

| Materials                      | Type       | $a = b$<br>(Å) | $h$<br>(Å)  | $l$<br>(Å)  | $E_{form}$<br>(eV/atom) | Band<br>type | $E_g^{HSE}$<br>(eV) | $E_g^{PBE}$<br>(eV) | $\Delta\phi$<br>(eV) | $\chi(\text{H}_2)$<br>(eV) | $\chi(\text{O}_2)$<br>(eV) |
|--------------------------------|------------|----------------|-------------|-------------|-------------------------|--------------|---------------------|---------------------|----------------------|----------------------------|----------------------------|
| $\text{InAlSSe}_2$ - $\alpha$  | I          | 3.89           | 6.38        | 4.08        | -0.84                   | D            | 1.27                | 0.61                | 1.71                 | 0.75                       | 0.99                       |
|                                | II         | 3.75           | 6.37        | 4.07        | -0.82                   | I            | 2.14                | 1.31                | 1.86                 | 1.03                       | 1.73                       |
|                                | <b>III</b> | <b>3.78</b>    | <b>6.26</b> | <b>3.82</b> | <b>-0.87</b>            | <b>D</b>     | <b>1.81</b>         | <b>1.12</b>         | <b>1.62</b>          | <b>1.06</b>                | <b>1.14</b>                |
| $\text{InAlSSe}_2$ - $\beta$   | I          | 3.86           | 6.50        | 4.08        | -0.82                   | I            | 1.88                | 1.18                | 1.46                 | 0.52                       | 1.58                       |
|                                | <b>II</b>  | <b>3.73</b>    | <b>6.54</b> | <b>4.09</b> | <b>-0.82</b>            | <b>I</b>     | <b>2.40</b>         | <b>1.60</b>         | <b>1.80</b>          | <b>0.97</b>                | <b>2.00</b>                |
|                                | III        | 3.75           | 6.44        | 3.85        | -0.82                   | I            | 2.18                | 1.52                | 1.86                 | 1.04                       | 1.77                       |
| $\text{InAlSeS}_2$ - $\alpha$  | I          | 3.87           | 6.16        | 3.84        | -0.87                   | I            | 2.73                | 1.92                | 1.92                 | 1.32                       | 2.10                       |
|                                | <b>II</b>  | <b>3.70</b>    | <b>6.17</b> | <b>3.84</b> | <b>-0.89</b>            | <b>D</b>     | <b>1.37</b>         | <b>0.70</b>         | <b>1.77</b>          | <b>1.01</b>                | <b>0.89</b>                |
|                                | III        | 3.68           | 6.27        | 4.10        | -0.84                   | I            | 1.82                | 1.01                | 1.99                 | 0.97                       | 1.61                       |
| $\text{InAlSeS}_2$ - $\beta$   | <b>I</b>   | <b>3.78</b>    | <b>6.36</b> | <b>3.87</b> | <b>-0.84</b>            | <b>I</b>     | <b>2.66</b>         | <b>1.83</b>         | <b>2.07</b>          | <b>1.17</b>                | <b>2.33</b>                |
|                                | II         | 3.68           | 6.33        | 3.87        | -0.83                   | D            | 1.86                | 1.21                | 1.70                 | 0.72                       | 1.62                       |
|                                | III        | 3.67           | 6.42        | 4.10        | -0.83                   | I            | 2.23                | 1.41                | 1.60                 | 0.65                       | 1.94                       |
| $\text{InAlTe}_2$ - $\alpha$   | I          | 4.06           | 6.88        | 4.46        | -0.53                   | M            | -                   | -                   | 1.18                 | -                          | -                          |
|                                | II         | 3.96           | 6.83        | 4.44        | -0.53                   | D            | 1.27                | 0.56                | 1.75                 | 1.06                       | 0.74                       |
|                                | <b>III</b> | <b>4.06</b>    | <b>6.49</b> | <b>3.75</b> | <b>-0.63</b>            | <b>I</b>     | <b>1.38</b>         | <b>0.83</b>         | <b>1.10</b>          | <b>1.11</b>                | <b>0.14</b>                |
| $\text{InAlTe}_2$ - $\beta$    | <b>I</b>   | <b>4.07</b>    | <b>6.92</b> | <b>4.42</b> | <b>-0.56</b>            | <b>I</b>     | <b>0.57</b>         | <b>0.07</b>         | <b>0.83</b>          | <b>-0.07</b>               | <b>0.25</b>                |
|                                | II         | 3.94           | 7.00        | 4.42        | -0.53                   | I            | 1.39                | 0.79                | 1.78                 | 0.99                       | 0.95                       |
|                                | III        | 4.00           | 6.68        | 3.81        | -0.55                   | I            | 1.58                | 1.08                | 1.55                 | 1.25                       | 0.65                       |
| $\text{InAlTeS}_2$ - $\alpha$  | I          | 4.01           | 6.26        | 3.80        | -0.72                   | I            | 3.13                | 2.17                | 1.89                 | 1.62                       | 2.17                       |
|                                | <b>II</b>  | <b>3.79</b>    | <b>6.30</b> | <b>3.79</b> | <b>-0.73</b>            | <b>M</b>     | -                   | -                   | <b>1.37</b>          | -                          | -                          |
|                                | III        | 3.74           | 6.63        | 4.54        | -0.64                   | M            | -                   | -                   | 1.77                 | -                          | -                          |
| $\text{InAlTeS}_2$ - $\beta$   | I          | 3.89           | 6.50        | 3.85        | -0.66                   | I            | 1.42                | 0.76                | 2.30                 | 1.19                       | 1.30                       |
|                                | <b>II</b>  | <b>3.80</b>    | <b>6.44</b> | <b>3.83</b> | <b>-0.67</b>            | <b>M</b>     | <b>0.30</b>         | <b>0</b>            | <b>1.35</b>          | -                          | -                          |
|                                | III        | 3.76           | 6.72        | 4.47        | -0.66                   | D            | 0.77                | 0.14                | 1.25                 | 0.31                       | 0.48                       |
| $\text{InAlSeTe}_2$ - $\alpha$ | I          | 4.15           | 6.97        | 4.43        | -0.56                   | M            | 0.15                | -                   | 1.06                 | -                          | -                          |
|                                | II         | 4.04           | 6.95        | 4.43        | -0.56                   | I            | 1.46                | 0.79                | 1.53                 | 1.09                       | 0.66                       |
|                                | <b>III</b> | <b>4.08</b>    | <b>6.72</b> | <b>3.99</b> | <b>-0.62</b>            | <b>I</b>     | <b>1.36</b>         | <b>0.83</b>         | <b>1.15</b>          | <b>1.08</b>                | <b>0.20</b>                |
| $\text{InAlSeTe}_2$ - $\beta$  | <b>I</b>   | <b>4.14</b>    | <b>7.02</b> | <b>4.40</b> | <b>-0.58</b>            | <b>I</b>     | <b>0.89</b>         | <b>0.36</b>         | <b>0.96</b>          | <b>0.21</b>                | <b>0.41</b>                |
|                                | II         | 4.02           | 7.08        | 4.41        | -0.56                   | I            | 1.67                | 1.07                | 1.61                 | 1.00                       | 1.05                       |
|                                | III        | 4.07           | 6.87        | 4.02        | -0.58                   | I            | 1.69                | 1.18                | 1.40                 | 1.14                       | 0.72                       |
| $\text{InAlTeSe}_2$ - $\alpha$ | <b>I</b>   | <b>4.12</b>    | <b>6.57</b> | <b>4.02</b> | <b>-0.71</b>            | <b>I</b>     | <b>2.43</b>         | <b>1.66</b>         | <b>1.60</b>          | <b>1.38</b>                | <b>1.43</b>                |
|                                | II         | 3.95           | 6.61        | 4.02        | -0.71                   | M            | 0.19                | 0                   | 1.19                 | -                          | -                          |
|                                | III        | 3.89           | 6.83        | 4.48        | -0.66                   | D            | 0.51                | 0                   | 1.44                 | 0.40                       | 0.32                       |
| $\text{InAlTeSe}_2$ - $\beta$  | I          | 4.02           | 6.77        | 4.04        | -0.67                   | I            | 1.92                | 1.24                | 1.86                 | 1.14                       | 1.40                       |
|                                | <b>II</b>  | <b>3.93</b>    | <b>6.73</b> | <b>4.04</b> | <b>-0.69</b>            | <b>D</b>     | <b>0.96</b>         | <b>0.46</b>         | <b>1.21</b>          | <b>0.55</b>                | <b>0.40</b>                |
|                                | III        | 3.90           | 6.93        | 4.44        | -0.68                   | D            | 1.24                | 0.61                | 1.32                 | 0.53                       | 0.80                       |

**Table S4** Calculated lattice parameters ( $a=b$ ), total heights ( $h$ ), interlayer distances between the two Group-III metal layers ( $l$ ), formation energies ( $E_{form}$ ), band types, band gaps at the HSE level ( $E_g^{HSE}$ ) and the PBE level ( $E_g^{PBE}$ ), differences of electrostatic potential between the two surfaces ( $\Delta\phi$ ), overpotentials for the hydrogen evolution reaction  $\chi(\text{H}_2)$  and the oxygen evolution reaction  $\chi(\text{O}_2)$  of the  $\text{GaAlXY}_2$  ( $X, Y = \text{S/Se/Te}$ ) monolayers, including  $\alpha$  and  $\beta$  phases (here, the most stable configurations are highlighted with blue font, and a material with a bandgap below 0.4 eV is typically classified as a metal).

| Materials                        | Type       | $a = b$<br>(Å) | $h$<br>(Å)  | $l$<br>(Å)  | $E_{form}$<br>(eV/atom) | Band<br>type | $E_g^{HSE}$<br>(eV) | $E_g^{PBE}$<br>(eV) | $\Delta\phi$<br>(eV) | $\chi(\text{H}_2)$<br>(eV) | $\chi(\text{O}_2)$<br>(eV) |
|----------------------------------|------------|----------------|-------------|-------------|-------------------------|--------------|---------------------|---------------------|----------------------|----------------------------|----------------------------|
| GaAlSSe <sub>2</sub> - $\alpha$  | I          | 3.75           | 6.18        | 3.95        | -0.85                   | I            | 1.66                | 0.96                | 1.53                 | 1.07                       | 0.89                       |
|                                  | II         | 3.92           | 6.21        | 3.96        | -0.81                   | I            | 2.01                | 1.23                | 1.76                 | 1.14                       | 1.40                       |
|                                  | <b>III</b> | <b>3.93</b>    | <b>6.09</b> | <b>3.71</b> | <b>-0.86</b>            | <b>I</b>     | <b>2.10</b>         | <b>1.40</b>         | <b>1.45</b>          | <b>1.12</b>                | <b>1.21</b>                |
| GaAlSSe <sub>2</sub> - $\beta$   | <b>I</b>   | <b>3.74</b>    | <b>6.19</b> | <b>3.92</b> | <b>-0.91</b>            | <b>I</b>     | <b>1.52</b>         | <b>0.82</b>         | <b>1.70</b>          | <b>0.64</b>                | <b>1.36</b>                |
|                                  | II         | 3.83           | 6.19        | 3.93        | -0.91                   | I            | 2.42                | 1.58                | 2.02                 | 1.35                       | 1.85                       |
|                                  | III        | 3.86           | 6.09        | 3.68        | -0.88                   | D            | 1.99                | 1.30                | 2.06                 | 1.32                       | 1.51                       |
| GaAlSeS <sub>2</sub> - $\alpha$  | I          | 3.71           | 6.00        | 3.72        | -0.86                   | I            | 2.74                | 1.88                | 1.79                 | 1.28                       | 2.02                       |
|                                  | <b>II</b>  | <b>3.84</b>    | <b>5.97</b> | <b>3.72</b> | <b>-0.90</b>            | <b>I</b>     | <b>1.84</b>         | <b>1.16</b>         | <b>1.55</b>          | <b>1.20</b>                | <b>0.97</b>                |
|                                  | III        | 3.83           | 6.09        | 3.97        | -0.86                   | I            | 1.81                | 1.04                | 1.81                 | 1.17                       | 1.22                       |
| GaAlSeS <sub>2</sub> - $\beta$   | <b>I</b>   | <b>3.68</b>    | <b>6.00</b> | <b>3.70</b> | <b>-0.95</b>            | <b>I</b>     | <b>3.01</b>         | <b>2.17</b>         | <b>2.30</b>          | <b>1.65</b>                | <b>2.43</b>                |
|                                  | II         | 3.80           | 5.99        | 3.69        | -0.93                   | D            | 1.53                | 0.85                | 1.99                 | 1.00                       | 1.28                       |
|                                  | III        | 3.78           | 6.08        | 3.94        | -0.93                   | I            | 2.08                | 1.24                | 1.90                 | 1.00                       | 1.74                       |
| GaAlTeS <sub>2</sub> - $\alpha$  | I          | 3.93           | 6.70        | 4.35        | -0.54                   | M            | 0.12                | 0                   | 1.03                 | -                          | -                          |
|                                  | II         | 4.14           | 6.73        | 4.34        | -0.45                   | D            | 0.69                | 0.13                | 1.79                 | 0.83                       | 0.42                       |
|                                  | <b>III</b> | <b>4.19</b>    | <b>6.32</b> | <b>3.66</b> | <b>-0.58</b>            | <b>I</b>     | <b>1.13</b>         | <b>0.60</b>         | <b>0.85</b>          | <b>0.57</b>                | <b>0.17</b>                |
| GaAlTeS <sub>2</sub> - $\beta$   | I          | 3.95           | 6.64        | 4.28        | -0.55                   | M            | -                   | -                   | 1.00                 | -                          | -                          |
|                                  | II         | 4.02           | 6.64        | 4.28        | -0.59                   | I            | 1.17                | 0.61                | 1.91                 | 1.13                       | 0.71                       |
|                                  | <b>III</b> | <b>4.12</b>    | <b>6.35</b> | <b>3.64</b> | <b>-0.62</b>            | <b>I</b>     | <b>1.11</b>         | <b>0.66</b>         | <b>1.67</b>          | <b>1.24</b>                | <b>0.32</b>                |
| GaAlTeS <sub>2</sub> - $\alpha$  | I          | 3.85           | 6.14        | 3.70        | -0.65                   | I            | 2.19                | 1.39                | 1.82                 | 1.24                       | 1.54                       |
|                                  | <b>II</b>  | <b>3.95</b>    | <b>6.14</b> | <b>3.67</b> | <b>-0.74</b>            | <b>M</b>     | -                   | -                   | <b>1.20</b>          | -                          | -                          |
|                                  | III        | 3.92           | 6.53        | 4.47        | -0.65                   | M            | -                   | -                   | 1.48                 | -                          | -                          |
| GaAlTeS <sub>2</sub> - $\beta$   | <b>I</b>   | <b>3.80</b>    | <b>6.12</b> | <b>3.67</b> | <b>-0.77</b>            | <b>I</b>     | <b>1.85</b>         | <b>1.17</b>         | <b>2.44</b>          | <b>1.40</b>                | <b>1.66</b>                |
|                                  | II         | 3.93           | 6.12        | 3.64        | -0.73                   | M            | -                   | -                   | 1.46                 | -                          | -                          |
|                                  | III        | 3.87           | 6.40        | 4.34        | -0.71                   | M            | 0.19                | 0                   | 1.46                 | -                          | -                          |
| GaAlSeTe <sub>2</sub> - $\alpha$ | I          | 4.01           | 6.80        | 4.32        | -0.54                   | I            | 0.42                | -                   | 0.88                 | 0.43                       | -0.36                      |
|                                  | II         | 4.19           | 6.81        | 4.32        | -0.50                   | I            | 0.86                | 0.31                | 1.47                 | 0.72                       | 0.37                       |
|                                  | <b>III</b> | <b>4.22</b>    | <b>6.55</b> | <b>3.90</b> | <b>-0.57</b>            | <b>I</b>     | <b>1.15</b>         | <b>0.63</b>         | <b>0.95</b>          | <b>0.63</b>                | <b>0.24</b>                |
| GaAlSeTe <sub>2</sub> - $\beta$  | I          | 4.02           | 6.74        | 4.25        | -0.58                   | M            | 0.24                | 0                   | 1.05                 | -                          | -                          |
|                                  | II         | 4.12           | 6.74        | 4.26        | -0.60                   | I            | 1.40                | 0.83                | 1.72                 | 1.07                       | 0.82                       |
|                                  | <b>III</b> | <b>4.16</b>    | <b>6.53</b> | <b>3.86</b> | <b>-0.63</b>            | <b>I</b>     | <b>1.29</b>         | <b>0.83</b>         | <b>1.50</b>          | <b>1.08</b>                | <b>0.48</b>                |
| GaAlTeSe <sub>2</sub> - $\alpha$ | I          | 3.97           | 6.44        | 3.92        | -0.65                   | I            | 1.97                | 1.26                | 1.50                 | 1.00                       | 1.24                       |
|                                  | <b>II</b>  | <b>4.08</b>    | <b>6.41</b> | <b>3.67</b> | <b>-0.69</b>            | <b>I</b>     | <b>0.74</b>         | <b>0.24</b>         | <b>0.93</b>          | <b>0.65</b>                | <b>-0.20</b>               |
|                                  | III        | 4.05           | 6.70        | 4.38        | -0.64                   | M            | 0.40                | 0                   | 1.27                 | -                          | -                          |
| GaAlTeSe <sub>2</sub> - $\beta$  | <b>I</b>   | <b>3.94</b>    | <b>6.41</b> | <b>3.88</b> | <b>-0.74</b>            | <b>I</b>     | <b>2.11</b>         | <b>1.48</b>         | <b>2.00</b>          | <b>1.24</b>                | <b>1.64</b>                |
|                                  | II         | 4.04           | 6.42        | 3.87        | -0.72                   | M            | 0.23                | 0                   | 1.39                 | -                          | -                          |
|                                  | III        | 4.00           | 6.61        | 4.29        | -0.71                   | D            | 0.73                | 0.12                | 1.44                 | 0.45                       | 0.48                       |

**Table S5** The efficiency of light absorption ( $\eta_{abs}$ ), the efficiency of carrier utilization ( $\eta_{cu}$ ), the STH efficiency ( $\eta_{STH}$ ), and the corrected STH efficiency ( $\eta'_{STH}$ ) of the MNX<sub>3</sub> (M, N = In/Ga/Al; X = S/Se/Te) monolayers, including  $\alpha$  and  $\beta$  phases.

| Materials<br>MNX <sub>3</sub>  | $\eta_{abs}(\%)$ | $\eta_{cu}(\%)$ | $\eta_{STH}(\%)$ | $\eta'_{STH}(\%)$ |
|--------------------------------|------------------|-----------------|------------------|-------------------|
| InGaS <sub>3</sub> - $\alpha$  | 50.5             | 53.8            | 27.2             | 19.6              |
| InGaS <sub>3</sub> - $\beta$   | 18.7             | 42.8            | 8.01             | 7.3               |
| InGaSe <sub>3</sub> - $\alpha$ | 81.9             | 56.4            | 46.2             | 28.3              |
| InGaSe <sub>3</sub> - $\beta$  | 47.1             | 52.7            | 24.9             | 20.0              |
| InGaTe <sub>3</sub> - $\alpha$ | 96.0             | 56.9            | 54.7             | 33.7              |
| InGaTe <sub>3</sub> - $\beta$  | 76.7             | 38.5            | 29.5             | 22.2              |
| InAlS <sub>3</sub> - $\alpha$  | 22.5             | 44.2            | 9.95             | 8.53              |
| InAlS <sub>3</sub> - $\beta$   | 11.7             | 40.0            | 4.69             | 4.37              |
| InAlSe <sub>3</sub> - $\alpha$ | 52.8             | 54.7            | 28.9             | 21.1              |
| InAlSe <sub>3</sub> - $\beta$  | 31.3             | 47.2            | 14.8             | 12.4              |
| InAlTe <sub>3</sub> - $\alpha$ | 77.4             | 41.8            | 32.4             | 22.1              |
| InAlTe <sub>3</sub> - $\beta$  | 58.2             | 56.7            | 33.0             | 24.9              |
| GaAlS <sub>3</sub> - $\alpha$  | 14.4             | 41.2            | 5.91             | 5.42              |
| GaAlS <sub>3</sub> - $\beta$   | 9.8              | 39.1            | 3.82             | 3.61              |
| GaAlSe <sub>3</sub> - $\alpha$ | 43.9             | 51.5            | 22.6             | 17.9              |
| GaAlSe <sub>3</sub> - $\beta$  | 41.0             | 50.5            | 20.7             | 15.9              |
| GaAlTe <sub>3</sub> - $\alpha$ | -                | -               | -                | -                 |
| GaAlTe <sub>3</sub> - $\beta$  | 73.8             | 51.1            | 37.8             | 25.3              |

**Table S6** The efficiency of light absorption ( $\eta_{abs}$ ), the efficiency of carrier utilization ( $\eta_{cu}$ ), the STH efficiency ( $\eta_{STH}$ ), and the corrected STH efficiency ( $\eta'_{STH}$ ) of the most stable InGaXY<sub>2</sub> (X, Y = S/Se/Te) monolayers, including  $\alpha$  and  $\beta$  phases.

| Materials                        | Type | $\eta_{abs}(\%)$ | $\eta_{cu}(\%)$ | $\eta_{STH}(\%)$ | $\eta'_{STH}(\%)$ |
|----------------------------------|------|------------------|-----------------|------------------|-------------------|
| InGaSSe <sub>2</sub> - $\alpha$  | III  | 81.3             | 67.0            | 54.5             | 32.0              |
| InGaSSe <sub>2</sub> - $\beta$   | I    | 55.2             | 55.6            | 30.7             | 24.5              |
| InGaSeS <sub>2</sub> - $\alpha$  | I    | 37.3             | 49.2            | 18.4             | 14.3              |
| InGaSeS <sub>2</sub> - $\beta$   | II   | 40.0             | 50.2            | 20.1             | 16.9              |
| InGaSTe <sub>2</sub> - $\alpha$  | III  | 88.6             | 45.9            | 40.6             | 25.0              |
| InGaSTe <sub>2</sub> - $\beta$   | I    | -                | -               | -                | -                 |
| InGaTeS <sub>2</sub> - $\alpha$  | I    | 17.3             | 42.3            | 7.3              | 6.5               |
| InGaTeS <sub>2</sub> - $\beta$   | II   | -                | -               | -                | -                 |
| InGaSeTe <sub>2</sub> - $\alpha$ | III  | 89.1             | 52.7            | 47.0             | 29.3              |
| InGaSeTe <sub>2</sub> - $\beta$  | I    | -                | -               | -                | -                 |
| InGaTeSe <sub>2</sub> - $\alpha$ | I    | 37.4             | 49.3            | 18.5             | 14.8              |
| InGaTeSe <sub>2</sub> - $\beta$  | II   | 81.2             | 44.8            | 36.4             | 27.9              |

**Table S7** The efficiency of light absorption ( $\eta_{abs}$ ), the efficiency of carrier utilization ( $\eta_{cu}$ ), the STH efficiency ( $\eta_{STH}$ ), and the corrected STH efficiency ( $\eta'_{STH}$ ) of the most stable InAlXY<sub>2</sub> (X, Y = S/Se/Te) monolayers, including  $\alpha$  and  $\beta$  phases.

| Materials                        | Type | $\eta_{abs}(\%)$ | $\eta_{cu}(\%)$ | $\eta_{STH}(\%)$ | $\eta'_{STH}(\%)$ |
|----------------------------------|------|------------------|-----------------|------------------|-------------------|
| InAlSSe <sub>2</sub> - $\alpha$  | III  | 45.4             | 52.1            | 23.7             | 18.0              |
| InAlSSe <sub>2</sub> - $\beta$   | II   | 20.9             | 43.6            | 9.1              | 8.0               |
| InAlSeS <sub>2</sub> - $\alpha$  | II   | 68.6             | 60.8            | 41.7             | 26.1              |
| InAlSeS <sub>2</sub> - $\beta$   | I    | 13.3             | 40.7            | 5.4              | 5.0               |
| InAlSTe <sub>2</sub> - $\alpha$  | III  | 68.1             | 33.2            | 22.6             | 16.5              |
| InAlSTe <sub>2</sub> - $\beta$   | I    | -                | -               | -                | -                 |
| InAlTeS <sub>2</sub> - $\alpha$  | II   | -                | -               | -                | -                 |
| InAlTeS <sub>2</sub> - $\beta$   | II   | -                | -               | -                | -                 |
| InAlSeTe <sub>2</sub> - $\alpha$ | III  | 69.3             | 37.0            | 25.7             | 18.4              |
| InAlSeTe <sub>2</sub> - $\beta$  | I    | 89.1             | 61.6            | 54.8             | 36.6              |
| InAlTeSe <sub>2</sub> - $\alpha$ | I    | 19.9             | 43.3            | 8.6              | 7.8               |
| InAlTeSe <sub>2</sub> - $\beta$  | II   | 87.4             | 58.6            | 51.3             | 31.8              |

**Table S8** The efficiency of light absorption ( $\eta_{abs}$ ), the efficiency of carrier utilization ( $\eta_{cu}$ ), the STH efficiency ( $\eta_{STH}$ ), and the corrected STH efficiency ( $\eta'_{STH}$ ) of the most stable GaAlXY<sub>2</sub> (X, Y = S/Se/Te) monolayers, including  $\alpha$  and  $\beta$  phases.

| Materials                        | Type | $\eta_{abs}(\%)$ | $\eta_{cu}(\%)$ | $\eta_{STH}(\%)$ | $\eta'_{STH}(\%)$ |
|----------------------------------|------|------------------|-----------------|------------------|-------------------|
| GaAlSSe <sub>2</sub> - $\alpha$  | III  | 32.1             | 47.5            | 15.2             | 12.9              |
| GaAlSSe <sub>2</sub> - $\beta$   | I    | 60.3             | 57.5            | 34.7             | 23.4              |
| GaAlSeS <sub>2</sub> - $\alpha$  | II   | 43.9             | 51.5            | 22.6             | 17.6              |
| GaAlSeS <sub>2</sub> - $\beta$   | I    | 5.9              | 37.0            | 2.2              | 2.1               |
| GaAlSTe <sub>2</sub> - $\alpha$  | III  | 80.0             | 41.2            | 33.0             | 24.2              |
| GaAlSTe <sub>2</sub> - $\beta$   | III  | 81.0             | 49.9            | 40.4             | 23.3              |
| GaAlTeS <sub>2</sub> - $\alpha$  | II   | -                | -               | -                | -                 |
| GaAlTeS <sub>2</sub> - $\beta$   | I    | 43.6             | 51.4            | 22.4             | 15.3              |
| GaAlSeTe <sub>2</sub> - $\alpha$ | III  | 79.1             | 44.4            | 35.1             | 25.0              |
| GaAlSeTe <sub>2</sub> - $\beta$  | III  | 71.3             | 55.7            | 39.7             | 25.8              |
| GaAlTeSe <sub>2</sub> - $\alpha$ | II   | -                | -               | -                | -                 |
| GaAlTeSe <sub>2</sub> - $\beta$  | I    | 31.6             | 47.3            | 15.0             | 12.0              |

**Table S9** The efficiency of light absorption ( $\eta_{abs}$ ), the efficiency of carrier utilization ( $\eta_{cu}$ ), the STH efficiency ( $\eta_{STH}$ ), and the corrected STH efficiency ( $\eta'_{STH}$ ) of the pristine Group-III metal trichalcogenide  $M_2X_3$  monolayers (M = In/Ga/Al, X = S/Se/Te).

| Materials<br>$MNX_3$                | $\eta_{abs}(\%)$ | $\eta_{cu}(\%)$ | $\eta_{STH}(\%)$ | $\eta'_{STH}(\%)$        |
|-------------------------------------|------------------|-----------------|------------------|--------------------------|
| <b>In<sub>2</sub>S<sub>3</sub></b>  | 37.7             | 49.4            | 18.6             | 14.8/14.4 <sup>[1]</sup> |
| <b>In<sub>2</sub>Se<sub>3</sub></b> | 64.6             | 58.7            | 37.9             | 26.4/26.9 <sup>[1]</sup> |
| <b>In<sub>2</sub>Te<sub>3</sub></b> | 77.1             | 53.0            | 40.9             | 28.9/32.1 <sup>[1]</sup> |
| <b>Ga<sub>2</sub>S<sub>3</sub></b>  | 15.1             | 41.5            | 6.3              | 5.8/6.4 <sup>[1]</sup>   |
| <b>Ga<sub>2</sub>Se<sub>3</sub></b> | 51.4             | 54.2            | 27.8             | 21.5/21.9 <sup>[1]</sup> |
| <b>Ga<sub>2</sub>Te<sub>3</sub></b> | -                | -               | -                | -                        |
| <b>Al<sub>2</sub>S<sub>3</sub></b>  | 7.9              | 38.2            | 3.0              | 2.9/2.6 <sup>[1]</sup>   |
| <b>Al<sub>2</sub>Se<sub>3</sub></b> | 21.6             | 43.9            | 9.5              | 8.2/8.0 <sup>[1]</sup>   |
| <b>Al<sub>2</sub>Te<sub>3</sub></b> | 62.9             | 45.7            | 28.7             | 20.1/21.4 <sup>[1]</sup> |

**Table S10** Calculated lattice parameters ( $a=b$ ), total heights ( $h$ ), interlayer distances between the two Group-III metal layers ( $l$ ), formation energies ( $E_{form}$ ), band types, band gaps at the HSE level ( $E_g^{HSE}$ ) and the PBE level ( $E_g^{PBE}$ ), differences of electrostatic potential between the two surfaces ( $\Delta\phi$ ), overpotentials for the hydrogen evolution reaction  $\chi(H_2)$  and the oxygen evolution reaction  $\chi(O_2)$  of the pristine Group-III trichalcogenide  $M_2X_3$  monolayers ( $M = \text{In}/\text{Ga}/\text{Al}$ ,  $X = \text{S}/\text{Se}/\text{Te}$ ), as well as some available results<sup>1,2</sup>.

| Materials<br>$MNX_3$     | $a = b$<br>(Å) | $h$<br>(Å) | $l$<br>(Å) | $E_{form}$<br>(eV/atom) | Band<br>type | $E_g^{HSE}$<br>(eV)                           | $E_g^{PBE}$<br>(eV) | $\Delta\phi$<br>(eV)                          | $\chi(H_2)$<br>(eV)                           | $\chi(O_2)$<br>(eV)                             |
|--------------------------|----------------|------------|------------|-------------------------|--------------|-----------------------------------------------|---------------------|-----------------------------------------------|-----------------------------------------------|-------------------------------------------------|
| $\text{In}_2\text{S}_3$  | 3.94           | 6.34       | 4.02       | -0.68                   | In           | 1.97/1.91 <sup>[1]</sup> /1.94 <sup>[2]</sup> | 1.20                | 1.69/1.68 <sup>[1]</sup> /1.68 <sup>[2]</sup> | 0.26/0.21 <sup>[1]</sup> /0.16 <sup>[2]</sup> | 2.18/2.15 <sup>[1]</sup> /2.10 <sup>[2]</sup>   |
| $\text{In}_2\text{Se}_3$ | 4.11           | 6.79       | 4.22       | -0.70                   | In           | 1.44/1.43 <sup>[1]</sup> /1.37 <sup>[2]</sup> | 0.79                | 1.40/1.38 <sup>[1]</sup> /1.22 <sup>[2]</sup> | 0.19/0.19 <sup>[1]</sup> /0.13 <sup>[2]</sup> | 1.42/1.39 <sup>[1]</sup> /1.40 <sup>[2]</sup>   |
| $\text{In}_2\text{Te}_3$ | 4.40           | 7.35       | 4.53       | -0.46                   | In           | 1.19/1.14 <sup>[1]</sup> /1.12 <sup>[2]</sup> | 0.64                | 1.01/1.00 <sup>[1]</sup> /1.05 <sup>[2]</sup> | 0.57/0.50 <sup>[1]</sup> /0.58 <sup>[2]</sup> | 0.39/0.41 <sup>[1]</sup> /0.37 <sup>[2]</sup>   |
| $\text{Ga}_2\text{S}_3$  | 3.65           | 5.92       | 3.75       | -0.79                   | In           | 2.59/2.55 <sup>[1]</sup> /2.56 <sup>[2]</sup> | 1.69                | 1.63/1.65 <sup>[1]</sup> /1.64 <sup>[2]</sup> | 1.06/1.05 <sup>[1]</sup> /1.01 <sup>[2]</sup> | 1.93/1.92 <sup>[1]</sup> /1.89 <sup>[2]</sup>   |
| $\text{Ga}_2\text{Se}_3$ | 3.84           | 6.33       | 3.94       | -0.74                   | In           | 1.69/1.68 <sup>[1]</sup> /1.64 <sup>[2]</sup> | 0.97                | 1.30/1.30 <sup>[1]</sup> /1.30 <sup>[2]</sup> | 0.71/0.69 <sup>[1]</sup> /0.65 <sup>[2]</sup> | 1.05/1.06 <sup>[1]</sup> /1.06 <sup>[2]</sup>   |
| $\text{Ga}_2\text{Te}_3$ | 4.15           | 6.93       | 4.28       | -0.44                   | In           | 0.74/0.77 <sup>[1]</sup> /0.72 <sup>[2]</sup> | 0.25                | 0.88/0.88 <sup>[1]</sup> /0.88 <sup>[2]</sup> | 0.43/0.43 <sup>[1]</sup> /0.36 <sup>[2]</sup> | -0.05/-0.01 <sup>[1]</sup> /0.01 <sup>[2]</sup> |
| $\text{Al}_2\text{S}_3$  | 3.59           | 5.82       | 3.69       | -1.17                   | In           | 2.90/2.94 <sup>[1]</sup>                      | 2.12                | 2.42/2.35 <sup>[1]</sup>                      | 1.73/1.72 <sup>[1]</sup>                      | 2.35/2.34 <sup>[1]</sup>                        |
| $\text{Al}_2\text{Se}_3$ | 3.79           | 6.24       | 3.90       | -0.99                   | In           | 2.38/2.41 <sup>[1]</sup>                      | 1.70                | 1.98/1.96 <sup>[1]</sup>                      | 1.64/1.63 <sup>[1]</sup>                      | 1.50/1.51 <sup>[1]</sup>                        |
| $\text{Al}_2\text{Te}_3$ | 4.12           | 6.87       | 4.24       | -0.55                   | In           | 1.47/1.51 <sup>[1]</sup>                      | 0.93                | 1.44/1.43 <sup>[1]</sup>                      | 1.28/1.27 <sup>[1]</sup>                      | 0.40/0.43 <sup>[1]</sup>                        |



**Figure S1** Calculated band structures of the  $MNX_3$  ( $M, N = \text{In/Ga/Al}$ ;  $X = \text{S/Se/Te}$ ) monolayers under the HSE functional, including  $\alpha$  and  $\beta$  phases. The Fermi levels are set to 0 eV.



**Figure S2** Calculated plane-averaged electrostatic differences of the  $MNX_3$  ( $M, N = \text{In/Ga/Al}; X = \text{S/Se/Te}$ ) monolayers, including  $\alpha$  and  $\beta$  phases.



**Figure S3** Chemical-bonding analysis of the middle-layer chalcogenides with adjacent metals in  $\text{InGaS}_3\text{-}\alpha/\beta$  and  $\text{GaAlTe}_3\text{-}\alpha/\beta$  with bonding levels to the right and antibonding ones to the left. The colors of the COHP plot correspond to the bonds highlighted in the structural fragments shown.



**Figure S4** Chemical-bonding analysis of the middle-layer chalcogenides with adjacent metals in  $\text{InGaS}_3\text{-}\alpha$ ,  $\text{InGaSe}_3\text{-}\alpha$ , and  $\text{InGaTe}_3\text{-}\alpha$  with bonding levels to the right and antibonding ones to the left. The colors of the COHP plot correspond to the bonds highlighted in the structural fragments shown in the upper left corner.



**Figure S5** Calculated band structures of the most stable  $\text{InGaXY}_2$  ( $X, Y=\text{S/Se/Te}$ ) monolayers under the HSE functional, including  $\alpha$  and  $\beta$  phases. The Fermi levels are set to 0 eV.



**Figure S6** Calculated plane-averaged electrostatic differences of the most stable  $\text{InGaXY}_2$  ( $X, Y=\text{S}/\text{Se}/\text{Te}$ ) monolayers, including  $\alpha$  and  $\beta$  phases.



**Figure S7** Calculated band structures of the most stable  $\text{InAlXY}_2$  ( $X, Y = \text{S/Se/Te}$ ) monolayers under the HSE functional, including  $\alpha$  and  $\beta$  phases. The Fermi levels are set to 0 eV.



**Figure S8** Calculated plane-averaged electrostatic differences of the most stable InAlXY<sub>2</sub> (X, Y = S/Se/Te) monolayers, including  $\alpha$  and  $\beta$  phases.



**Figure S9** Calculated band structures of the most stable  $\text{GaAlXY}_2$  ( $X, Y=\text{S/Se/Te}$ ) monolayers under the HSE functional, including  $\alpha$  and  $\beta$  phases. The Fermi levels are set to 0 eV.



**Figure S10** Calculated plane-averaged electrostatic differences of the most stable GaAlXY<sub>2</sub> (X, Y = S/Se/Te) monolayers, including  $\alpha$  and  $\beta$  phases.



**Figure S11.** (a) Evolution of total energies (temperatures) from AIMD simulations at 300K and (b) the phonon dispersions for the GaAlS<sub>3</sub>- $\alpha/\beta$  and GaAlSe<sub>2</sub>- $\alpha/\beta$  (most stable type) derivatives.



**Figure S12** Calculated band structures of the pristine  $M_2X_3$  monolayers ( $M = \text{In/Ga/Al}$ ,  $X = \text{S/Se/Te}$ ) under the HSE06 functional. The Fermi levels are set to 0 eV.



**Figure S13** Calculated plane-averaged electrostatic differences of the pristine Group-III trichalcogenide  $\text{M}_2\text{X}_3$  monolayers ( $\text{M} = \text{In}/\text{Ga}/\text{Al}$ ,  $\text{X} = \text{S}/\text{Se}/\text{Te}$ ) with the HSE06 potential. The red dashed lines represent Fermi levels.



**Figure S14** The orbital-projected band structures and partial charge densities of the CBMs and VBMs for the GaAlSTe<sub>2</sub>-α and GaAlSeTe<sub>2</sub>-α monolayers.



**Figure S15** Calculated enthalpy of solvation  $\Delta H_{\text{sol}}$  for the 19  $\text{MNX}_3$  and  $\text{MNXY}_2$  monolayers (the STH efficiency  $\geq 20\%$ ). The high  $\Delta H_{\text{sol}}$  suggests that the relevant monolayer is insoluble in water.



**Figure S16** Calculated H adsorption free energy of hydrogen reduction half-reaction in the basal planes of the perfect InGaTe<sub>3-α</sub>, GaAlSSe<sub>2-β</sub>, InGaSSe<sub>2-β</sub>, and InAlSeTe<sub>2-β</sub> monolayer structures.

**a****b**

**Figure S17.** (a) Formation energies of vacancy defects in the InGaTe<sub>3-α</sub>, InGaSSe<sub>2-β</sub>, InAlSeTe<sub>2-β</sub> and GaAlSSe<sub>2-β</sub> monolayers. (b) The density of states of the InGaSSe<sub>2-β</sub>, InAlSeTe<sub>2-β</sub> and GaAlSSe<sub>2-β</sub> monolayers with vacancy defects. as well as the insets are their charge density differences, here, the orange and blue colors represent electron accumulation and depletion areas.

## References

- 1 C.-F. Fu, J. Sun, Q. Luo, X. Li, W. Hu and J. Yang, *Nano Lett.*, 2018, **18**, 6312–6317.
- 2 X. Liu, P. Cheng, X. Zhang, T. Shen, J. Liu, J.-C. Ren, S. Li and W. Liu, *J. Mater. Chem. A*, 2021, **9**, 14515.
